# Supplementary material
Source: PubMed Central journal article supplement (PMC4098016)
Supplement: jbjs_95_23_2105_ds01.pdf [file jbjs_95_23_2105_ds01.pdf]

| TABLE E-1 Charlson Comorbidity Index Scoring System |                                                                           |
|-----------------------------------------------------|---------------------------------------------------------------------------|
| Score                                               | Condition                                                                 |
| 1                                                   | Myocardial infarction                                                     |
| 1                                                   | Congestive heart failure                                                  |
| 1                                                   | Peripheral vascular disease (including aortic aneurysm of <6 cm)          |
| 1                                                   | Cerebrovascular disease                                                   |
| 1                                                   | Chronic pulmonary disease                                                 |
| 1                                                   | Dementia                                                                  |
| 1                                                   | Connective tissue disease                                                 |
| 1                                                   | Peptic ulcer disease                                                      |
| 1                                                   | Mild liver disease (without portal hypertension)                          |
| 1                                                   | Diabetes without end-stage organ damage                                   |
| 2                                                   | Hemiplegia following stroke                                               |
| 2                                                   | Moderate or severe renal disease                                          |
| 2                                                   | Diabetes with end-stage organ damage                                      |
| 2                                                   | Tumor without metastasis (if less than five years from initial diagnosis) |
| 2                                                   | Leukemia                                                                  |
| 2                                                   | Lymphoma                                                                  |
| 3                                                   | Moderate or severe liver disease                                          |
| 6                                                   | Metastasis solid tumor                                                    |
| 6                                                   | Acquired immune deficiency syndrome (AIDS)                                |
